# Solving the Sample Size Problem for Resource Selection

## Analysis

Garrett M. Street<sup>\*1,2</sup>, Jonathan R. Potts<sup>3</sup>, Luca Börger<sup>4,5</sup>, James C. Beasley<sup>6</sup>, Stephen Demarais<sup>1</sup>, John M. Fryxell<sup>7</sup>, Philip D. McLoughlin<sup>8</sup>, Kevin L. Monteith<sup>9</sup>, Christina M. Prokopenko<sup>10</sup>, Milton C. Ribeiro<sup>11</sup>, Arthur R. Rodgers<sup>12</sup>, Bronson K. Strickland<sup>1</sup>, Floris M. van Beest<sup>13</sup>, David A. Bernasconi<sup>6</sup>, Larissa T. Beumer<sup>13</sup>, Guha Dharmarajan<sup>6</sup>, Samantha P. Dwinell<sup>14</sup>, David A. Keiter<sup>6</sup>, Alexine Keuroghlian<sup>15</sup>, Levi J. Newediuk<sup>10</sup>, Júlia Emi F. Oshima<sup>11</sup>, Olin Rhodes Jr.<sup>6</sup>, Peter E. Schlichting<sup>6</sup>, Niels M. Schmidt<sup>13</sup>, and Eric Vander Wal<sup>10</sup>

<sup>1</sup>Department of Wildlife, Fisheries, and Aquaculture, Mississippi State University,  
Mississippi State, MS, 39762, USA

<sup>2</sup>Quantitative Ecology and Spatial Technologies Laboratory, Mississippi State  
University, Mississippi State, MS, 39762, USA

<sup>3</sup>School of Mathematics and Statistics, University of Sheffield, Sheffield, S3 7RH, United  
Kingdom

<sup>4</sup>Department of Biosciences, Swansea University, Swansea, SA2 8PP, United Kingdom

<sup>5</sup>Centre for Biomathematics, Swansea University, Swansea, SA2 8PP, United Kingdom

<sup>6</sup>Savannah River Ecology Laboratory, University of Georgia, Aiken, SC, 29802, USA

<sup>7</sup>Department of Integrative Biology, University of Guelph, Guelph, Ontario, N1G 2W1,  
Canada

<sup>8</sup>Department of Biology, University of Saskatchewan, Saskatoon, Saskatchewan, S7N  
5E2, Canada

<sup>9</sup>Haub School of Environment and Natural Resources, University of Wyoming,  
Laramie, WY, 82072, USA

<sup>10</sup>Department of Biology, Memorial University of Newfoundland, St. John's,  
Newfoundland, A1B 3X9, Canada

<sup>11</sup>Instituto de Biosciências, Universidad Estadual Paulista, Rio Claro, São Paulo, Brazil

<sup>12</sup>Centre for Northern Forest Ecosystem Research, Ontario Ministry of Natural  
Resources and Forestry, Thunder Bay, Ontario, P7E 6S8, Canada

<sup>13</sup>Department of Bioscience, Aarhus University, Aarhus, Denmark

<sup>14</sup>Wyoming Cooperative Fish and Wildlife Research Unit, University of Wyoming,  
Laramie, WY, 82071, USA

<sup>15</sup>IUCN/SSC Peccary Specialist Group, Campo Grande, Brazil

*Manuscript type:* Standard Paper

*Abstract word count:* 350

*Main text word count:* 4904

*Number of figures:* 5

*Number of tables:* 0

---

\*Corresponding Author (gms246@msstate.edu)

## Abstract

1. Sample size sufficiency is a critical consideration for conducting Resource-Selection Analyses (RSAs) from GPS-based animal telemetry. Cited thresholds for sufficiency include a number of captured animals  $M \geq 30$  and as many relocations per animal  $N$  as possible. These thresholds render many RSA-based studies misleading if large sample sizes were truly insufficient, or unpublishable if small sample sizes were sufficient but failed to meet reviewer expectations.
2. We provide the first comprehensive solution for RSA sample size by deriving closed-form mathematical expressions for the number of animals  $M$  and the number of relocations per animal  $N$  required for model outputs to a given degree of precision. The sample sizes needed depend on just 2 biologically meaningful quantities: habitat selection strength and a novel measure of landscape complexity, which we define rigorously. The mathematical expressions are calculable for any environmental dataset at any spatial scale and are applicable to any study involving resource selection (including sessile organisms). We validate our analytical solutions using globally relevant empirical data including 5,678,623 GPS locations from 511 animals from 10 species (omnivores, carnivores, and herbivores living in boreal, temperate, and tropical forests, montane woodlands, swamps, and arctic tundra).
3. Our analytic expressions show that the required  $M$  and  $N$  must decline with increasing selection strength and increasing landscape complexity, and this decline is insensitive to the definition of availability used in the analysis. Our results contradict conventional wisdom by demonstrating that the most biologically relevant effects on the utilization distribution (i.e. those landscape conditions with the greatest absolute magnitude of resource selection) can often be estimated with far fewer data than is commonly assumed.
4. We identify several critical steps in implementing these equations, including (i) a priori selection of expected model coefficients, and (ii) sampling intensity for background

(absence/pseudo-absence) data within a given definition of availability. We show that ran-  
27 dom sampling of background data violates the underlying mathematics of RSA, leading to  
incorrect values for necessary  $M$  and  $N$  and potentially incorrect RSA model outputs. We  
argue that these equations should be a mandatory component for all future RSA studies.

30 *Keywords:* bootstrap, habitat selection, p-value, power analysis, Resource Selection Function,  
sample size, Species Distribution Model, validation

## Introduction

33 Resource selection analysis (RSA) is a broad framework linking the distribution of animals to  
their preferences for specific habitat conditions and is a fundamental tool in animal ecology  
(Boyce & McDonald 1999; Strickland & McDonald 2006). Obtaining sufficient locations to ascer-  
36 tain the distribution of animals across landscapes is a fundamental requirement for RSA. Indeed,  
to understand intra-specific variation in the distribution of animals – a critical research aim in  
basic and applied animal ecology – it is necessary to obtain repeated localizations on multiple  
39 individuals, now commonly collected using animal-attached GPS sensors (Hebblewhite & Hay-  
don 2010). GPS data on animal movements are hence commonly employed for RSA and are  
often analyzed using Resource Selection Functions (RSFs; Boyce & McDonald 1999; Manly *et al.*  
42 2002; Elith & Leathwick 2009; Hebblewhite & Haydon 2010). RSFs are a class of exponential  
models of space use that estimate the probability distribution of animal locations using different  
resources/conditions in the landscape, taking into account the availability of each resource, and  
45 thereby provide a measure of the ‘strength’ of (behavioral) selection for or against each resource  
(Manly *et al.* 2002). RSFs are easily fitted using standard statistical models (commonly logistic or  
conditional logistic regression) applied to data on animal locations and resource distributions in  
48 the landscape and have become a cornerstone of research in spatial ecology (Manly *et al.* 2002;  
Elith & Leathwick 2009; Renner & Warton 2013).

Given the prevalence of RSFs, it is surprising that the central question determining the validity  
51 of inferences obtained – how much data is needed to estimate a RSF for a given species? –  
has not been solved. This issue has been broached for occupancy analysis (Guillera-Arroita &  
Lahoz-Monfort 2012) and generalized linear mixed models (Johnson *et al.* 2015), and has been  
54 evaluated within individual RSF studies using simulations (Leban *et al.* 2001; Loe *et al.* 2012),  
yet no analytic expressions exist to determine the number of animals ( $M$ ) and relocations per  
animal ( $N$ ) required to obtain RSF outputs to a given degree of precision. While the accuracy  
57 and precision of RSFs generally increase with sample size, leading to a standard rule-of-thumb

of  $M \geq 30$  needed for reliable ecological inference (Leban *et al.* 2001), this rough guideline is grounded in century-old thinking about statistics in the pre-computation world (James *et al.* 2013). Crucially, it is also oblivious to the ecological reality that a multitude of factors may affect selection strength and determine the required sample size (Manly *et al.* 2002; McLoughlin *et al.* 2010; Hebblewhite & Haydon 2010). These include density-dependence (i.e. certain habitats become less attractive when occupied by conspecifics; Fretwell & Lucas 1969; McLoughlin *et al.* 2010; van Beest *et al.* 2016), trade-offs in selection for forage and cover under predation risk (Fortin *et al.* 2005; McLoughlin *et al.* 2010), temporal variations in resource dynamics (McLoughlin *et al.* 2010; Paolini *et al.* 2018), or the degree of habitat availability or heterogeneity in a landscape (Mysterud & Ims 1998; McLoughlin *et al.* 2010; van Beest *et al.* 2016; Paolini *et al.* 2018). There is no consistency in RSF studies in the number of replicates used (Hebblewhite & Haydon 2010), as the only alternative approaches to establishing the number of replicates a priori are ecologically informed guesswork, or simply to collect as much data as possible.

The crux of the problem lies in the relationship between sample size and ecological complexity. It is suggested that more complex systems require more data to describe (Wisz *et al.* 2008), yet a robust power analysis (Johnson *et al.* 2015) allowing examination of the relationship between RSF estimation, system complexity, and data availability is crucially missing. This has obvious economic and ethical implications if more animals are tagged and monitored than needed and affects research aimed at the conservation of species, which requires reliable estimates of animal-habitat relationships but where it is often impossible to monitor large numbers of animals. Here, we provide a solution to the sample size problem in RSFs by deriving analytic expressions for the values of  $M$  and  $N$  (the number of animals and relocations per animal respectively) required to estimate RSFs to a required degree of accuracy, taking into account landscape complexity and the strength of selection for the resources. We validate these expressions using simulations and a large dataset of GPS-tagged animals (including 10 species from different continents and biomes) and show that the most biologically relevant effects of landscapes on animal distributions can often be estimated with far fewer animals and locations than are commonly stated.

## Methods

We begin by describing mathematically how to determine the number of locations per animal  
87 ( $N$ ) and the number of animals ( $M$ ) for RSA. RSA seeks to parametrize a model of space use that  
has the following form (Manly *et al.* 2002):

$$90 \quad u(\mathbf{x}) = \frac{A(\mathbf{x})W(\mathbf{x})}{\int_{\Omega} A(\mathbf{x}')W(\mathbf{x}')d\mathbf{x}'}, \quad (1)$$

where  $u(\mathbf{x})$  is the *utilization distribution* of the study species (i.e. the probability density function  
of the study animals' locations),  $A(\mathbf{x})$  is a function denoting the availability of the point  $\mathbf{x}$  to  
93 the animals,  $\Omega$  is the study area, and  $W(\mathbf{x})$  is the RSF. (Note: throughout this manuscript, bold  
fonts imply that the quantity is a vector.) For the purposes of our analytic calculations, our  
RSF will be dependent upon a single resource layer  $R(\mathbf{x})$ . This could denote, for example, the  
96 vegetation quality or prey availability at point  $\mathbf{x}$ . However, in general,  $R(\mathbf{x})$  represents a map of  
any environmental feature which is hypothesized to covary with space use. Although we only  
look at one resource layer at a time for our analytic calculations, we show in our empirical study  
99 (below) that the resulting formulae work when the RSF has multiple layers.

As is the standard method for RSA, we make 3 simplifying assumptions (Manly *et al.* 2002):  
(i) our weighting function is of the form  $W(\mathbf{x}|\beta) = \exp[\beta R(\mathbf{x})]$ , where  $\beta$  is a parameter to be  
102 estimated; (ii) the availability kernel  $A(\mathbf{x})$  is a uniform distribution; and (iii) relocations are  
independent. Consequently, our model of space use from Equation (1) becomes:

$$105 \quad u(\mathbf{x}|\beta) = \frac{\exp[\beta R(\mathbf{x})]}{\int_{\Omega} \exp[\beta R(\mathbf{x}')d\mathbf{x}'}. \quad (2)$$

The aim of this section is to understand how many independent samples are required to give an  
accurate parametrization of the model in Equation (2).

## 108 **Locations from a Single Individual ( $N$ )**

We first need to phrase the question "How many locations?" in a concrete, mathematical way. Suppose we wish to test the null hypothesis  $H_0 : \beta = 0$  against the alternative  $H_1 : \beta \neq 0$  at a significance level  $p \in (0, 1)$ . An experiment to test this hypothesis involves measuring  $N$  samples and using (conditional) logistic regression to infer  $\beta$  and test the null hypothesis (as is the standard method for resource selection, e.g. Manly *et al.* 2002). We define  $N_{\alpha,p}(\beta)$  to be the minimum number of samples required so that we expect to reject the null hypothesis in  $100(1 - \alpha)\%$  of experiments. An approximate analytical formula for  $N_{\alpha,p}(\beta)$  is given as follows (derived in Supplementary Appendix A):

$$117 \quad N_{\alpha,p}(\beta) \approx \frac{(z_\alpha + z_{p/2})^2}{\text{Var}[R(X_\beta)]} \beta^{-2}. \quad (3)$$

Here,  $z_\alpha = \Phi^{-1}(1 - \alpha)$  where  $\Phi(\cdot)$  is the cumulative distribution function for the standard normal distribution (e.g.  $z_{0.05} \approx 1.645$ ,  $z_{0.025} \approx 1.96$ ),  $X_\beta$  is a random variable whose probability density function is given by Equation (2), and  $\text{Var}[R(X_\beta)]$  is the variance of  $R(X_\beta)$ . An explicit functional expression for  $\text{Var}[R(X_\beta)]$  can be written as follows:

$$123 \quad \text{Var}[R(X_\beta)] = \frac{\int_\Omega R^2(\mathbf{x}) \exp[\beta R(\mathbf{x})] \, d\mathbf{x}}{\int_\Omega \exp[\beta R(\mathbf{x})] \, d\mathbf{x}} - \left( \frac{\int_\Omega R(\mathbf{x}) \exp[\beta R(\mathbf{x})] \, d\mathbf{x}}{\int_\Omega \exp[\beta R(\mathbf{x})] \, d\mathbf{x}} \right)^2. \quad (4)$$

We call  $\text{Var}[R(X_\beta)]$  "landscape complexity". Critically, this form of landscape complexity is determined in part by multiplying the landscape layer by the expected  $\beta$ , so it should be understood as representing the landscape complexity *as viewed by the animal*.

The formula in Equation (3) is approximate due to two assumptions: (i) it relies on the standard error,  $\sigma$ , of the maximum likelihood function being approximately normally distributed, and (ii) it uses a standard result relating the standard error for the estimator of  $\beta$  to the second derivative of the log-likelihood function (see Supplementary Appendix A for more details). Therefore it is necessary to investigate the magnitude of these approximating assumptions using



simulated data.

To test how effective the approximate expression from Equation (3) is at capturing the actual  
135 number of samples required to infer  $\beta$  with a given level of accuracy, we constructed a simulated  
resource layer which describes an example of the function  $R(\mathbf{x})$  (Fig. 1a). This test layer is  
a Gaussian random field, previously used in the context of resource selection by Potts *et al.*  
138 (2014). It was generated by the R function `GaussRF()` from the `RandomFields` package (Schlather  
*et al.*, 2016), using the exponential model with mean=0, variance=1, nugget=0, and scale=10, and  
consists of  $L = 100$  by  $L = 100$  pixels. By sampling  $N$  times from Equation (2) for various  
141  $N$  with  $R(\mathbf{x})$ , we can compute empirical values for  $N_{\alpha,p}(\beta)$  for different  $\beta$  (full method given  
in Supplementary Appendix B). Comparison of these empirically-derived values alongside the  
analytical expression from Equation (3) reveals remarkably strong agreement (Fig. 1b). This  
144 suggests that Equation (3) gives an accurate estimation of the number of independent samples  
required to estimate  $\beta$ .

### Locations from multiple individuals ( $M$ )

147 Now we assume that there are  $M$  individuals and they each select resources with different  $\beta$ .  
To model this, let  $\beta_1, \dots, \beta_M \sim N(\beta, s^2)$  be independent draws from a normal distribution  
with mean  $\beta$  and variance  $s^2$ . Then  $\beta_i$  is the coefficient of resource selection for individual  
150  $i \in \{1, \dots, M\}$ . Suppose for each individual  $i$  we have gathered  $N_i$  locations. Let  $\hat{\beta}_i$  be the  
maximum likelihood estimator for  $\beta_i$ . Then the standard deviation of  $\hat{\beta}_i$  can be estimated as  
(Supplementary Appendix A, Equation 15):

$$153 \quad \sigma_i = \frac{1}{\sqrt{N_i \text{Var}[R(X_{\beta_i})]}}. \quad (5)$$

If  $\hat{\beta}$  is the mean of  $\hat{\beta}_1, \dots, \hat{\beta}_M$ , then  $\hat{\beta}$  is normally distributed as follows (Supplementary Appendix  
 156 C):

$$\hat{\beta} \sim N\left(\beta, \frac{1}{M^2} \sum_{i=1}^M \sigma_i^2 + \frac{s^2}{M}\right). \quad (6)$$

159 Thus  $\hat{\beta}$  is an unbiased estimator of  $\beta$ . Notice that the variance decays as  $M$  increases. If the practitioner has some prior expectation of the possible values of  $\beta$  and  $s^2$ , Equation (6) can be used to calculate the number of animals,  $M$ , required to obtain an empirical estimate of  $\beta$  to a  
 162 given degree of accuracy.

As well as calculating an estimate of  $\beta$ , it is also possible to estimate  $s^2$ . The following is an unbiased estimator of  $s^2$  for  $M \geq 2$  (Supplementary Appendix C):

$$165 \quad \hat{s}^2 = \frac{1}{M-1} \sum_{i=1}^M \left( \hat{\beta}_i - \frac{1}{M} \sum_{j=1}^M \hat{\beta}_j \right)^2 - \frac{1}{M} \sum_{i=1}^M \sigma_i^2. \quad (7)$$

We were not able to derive a closed analytic formula for the uncertainty in the estimator given in  
 168 Equation (7); however, we provide code for estimating this using random sampling (see Supplementary Appendix D). In general, the estimator becomes more precise for lower  $\sigma_i$  and higher  $M$ . This is shown in Supplementary Appendix D, where we also verify numerically Equations  
 171 (6) and (7).

Equation (6) allows us to calculate the minimum number of animals,  $M_{\alpha,p}(\beta)$ , for which we would expect to reject the null hypothesis that  $\beta = 0$ , at significance level  $p$ ,  $100(1 - \alpha)\%$  of the  
 174 time (two-tailed test).  $M_{\alpha,p}(\beta)$  is the minimum integer,  $M$ , that satisfies the following inequality:

$$M \geq \frac{s^2(z_{p/2} + z_\alpha)^2 + \sqrt{s^4(z_{p/2} + z_\alpha)^4 + 4\beta^2(z_{p/2} + z_\alpha)^2 \sum_{i=1}^M \sigma_i^2}}{2\beta^2}. \quad (8)$$

## 177 **Data and Resource Selection Functions**

Equations (3) and (8) give predicted values for the number of relocations  $N$  and the number of animals  $M$  required for RSF estimation. To test our analytical predictions, we compiled GPS-based relocation datasets from 10 separate species with accompanying landscape data in raster format (Table S1; Fig. 2). Landscape data were either categorical (i.e. discrete landscover) or numeric (e.g. elevation, precipitation, etc.). To ensure comparability between model outputs for each species, we centered and scaled each numeric landscape raster in R using the `scale()` function with default parameters. We converted categorical landcover rasters to binary raster layers for each landcover classification of interest (e.g. deciduous forest, croplands, etc.) to acquire estimates of  $\text{Var}[R(X_\beta)]$  for a given categorical raster.

We generated a 1:1 sample of availability (i.e. 1 available location per animal relocation) within each animal's 99% home range as estimated using the function `kernelUD()` in R package `adehabitatHR` with the default bandwidth estimator. We extracted centered-and-scaled (numeric) and binary (categorical) landscape data to animal relocations and available locations and fit a RSF to each animal in each dataset using logistic regression (i.e. 511 individual models; Table S2). For simplicity, we used only linear main effects for each predictor in a given RSF; however, we emphasize that more complex effects (e.g. non-linear and interaction terms) may be identically investigated using the appropriate non-linear transformation or multiplicative product on the resource layer(s) prior to calculation. Note that, although our equations operate on a single resource layer at a time, our analysis uses RSFs with multiple layers. This procedure thus tests whether multiple layers may be analyzed one-at-a-time to ascertain the number of animals and fixes required to estimate the  $\beta$ -value for each layer.

### **Empirical Validation: $M$**

After fitting each RSF, we calculated the mean selection coefficient  $\bar{\beta}$  for each landscape layer across individuals within a species. Assuming  $\bar{\beta}$  was an accurate estimate of population-level

selection  $\beta$ , we asked: how many animals  $M$  were necessary to estimate  $\beta$ ? We calculated  $\text{Var}[R(X_\beta)]$  for each centered-and-scaled or binary raster within each animal's 99% range according to Equation (4) and the resulting values of  $N$  according to Equation (3). We generated empirical distributions of  $\hat{\beta}$  and  $\hat{s}^2$  as described in Supplementary Appendix D for  $M \in \{2, \dots, 30\}$  using the average  $N$  and  $\text{Var}[R(X_\beta)]$  as population-level estimates of each. We computed the empirical 95% intervals at a given  $M$  (i.e.  $\alpha = 0.05$ ). The value of  $M$  at which the empirical interval no longer contains 0 is the predicted minimum  $M$  necessary to estimate  $\beta$  with 95% confidence,  $M_{pred}$  (i.e. the minimum integer  $M_{0.05,0.05}(\beta)$ ; Equation (8)).

For comparison with observation, we then resampled the estimated selection coefficients for each individual within a species. For a given  $M \in \{2, \dots, 30\}$  as above, we generated 4000 samples of  $M_i$  observed selection coefficients and calculated  $\bar{\beta}$  for each (i.e. 4000 mean selection coefficients assuming  $M_i$  animals). This represents the observed distribution of possible  $\bar{\beta}$  for  $M_i$  sampled animals, assuming the total pool of animals is a representative sample. Finally, for each  $M$  we calculated the grand mean  $\bar{\beta}_G$  and the empirical 95% interval of  $\bar{\beta}$ . The value of  $M$  at which the empirical interval no longer contains 0 is the observed minimum  $M$  necessary to estimate  $\beta$  with 95% confidence,  $M_{obs}$ , and should correspond to  $M_{pred}$

## Empirical Validation: $N$

The  $M$  validation procedure described above assumes that, on average, sufficient relocations  $N$  were available to estimate  $M$ . Now we consider: for a given individual-level selection coefficient  $\beta$ , do we have sufficient  $N$  to reject the null hypothesis for a given animal? We randomly sampled 1 animal from each dataset and calculated  $\text{Var}[R(X_\beta)]$  within the animal's 99% range using the animal's specific RSF model coefficients as  $\beta$ . From this we calculated the predicted number of relocations  $N_{pred}$  necessary to estimate  $\beta$  given  $\text{Var}[R(X_\beta)]$  (i.e.  $N_{0.05,0.05}(\beta)$ ; Equation (3)).

For comparison, we resampled  $N_{sam}$  relocations with replacement from the animal's dataset, where  $N_{sam} = \left\lfloor \frac{iN_{total}}{50} \right\rfloor$ ,  $i \in \{1, \dots, 25\}$ , and  $N_{total}$  is the total number of relocations recorded for that animal. This unconventional sequence was selected because (i) it produced a compara-

228 ble number of observed values of  $N$  to that in the  $M$  validation procedure (25 observed  $N$  vs.  
29 pairings of  $M_{pred}$  and  $M_{obs}$ ) while (ii) keeping the increments small enough to retain detail  
given that estimates of  $N$  can be orders of magnitude larger than those of  $M$ . We generated 4000  
231 samples of  $N_{sam,i}$  relocations and fit an RSF to each individual sample (i.e. 4000 RSFs assuming  
 $N_{sam,i}$  relocations). We retained all originally generated available locations in each RSF so as to  
maintain a constant availability kernel between RSFs with different relocations. We then calcu-  
234 lated the mean selection coefficient  $\bar{\beta}$  and its 95% empirical interval at a given  $N_{sam}$ . The value of  
 $N_{sam}$  at which the empirical interval no longer contains 0 is the observed minimum  $N$  necessary  
to reject  $H_0 : \beta = 0$  at significance level  $p \leq 0.05$ ,  $N_{obs}$ , and should correspond to  $N_{pred}$ .

## 237 Results

The equations (3, 8) at the basis of our methods provide analytically predicted values for the  
number of relocations  $N$  and the number of animals  $M$  required to parameterize an RSF. Simple  
240 1-to-1 plots of  $N_{pred}$  vs.  $N_{obs}$  and  $M_{pred}$  vs.  $M_{obs}$  across all 10 species revealed remarkable agree-  
ment between observation and prediction (Fig. 3). Interestingly, 1 outlier was identified for  $N$  and  
1 for  $M$ . Visual inspection of the data revealed that these outliers occurred alongside availability  
243 samples within individual RSFs that did not properly describe the true spatial integral of re-  
source availability (i.e.  $\int_{\Omega} A(\mathbf{x}')W(\mathbf{x}')d\mathbf{x}'$ ; Equation (1)). That is, the 1:1 used/available sampling  
protocol undersampled the available space. Thus,  $N_{pred}$  and  $M_{pred}$  can be sensitive to insufficient  
246 spatial sampling of availability, and care should be taken to avoid such undersampling before  
applying these methods.

Given this, we then asked, what is the role of the definition of availability (sensu Johnson 1980)  
249 in shaping these relationships? Our original calculations of  $N_{pred}$  and  $M_{pred}$  used individual  
availability (i.e. each animal has its own available resources within its unique 99% KDE). We  
repeated our calculations of  $N_{pred}$  and  $M_{pred}$ , and bootstrap estimation of  $N_{obs}$  and  $M_{obs}$ , using 2  
252 additional availability definitions that varied the spatial extent of availability for a given animal:

(i) within the entire collection of 99% KDEs (i.e. animals have access to resources within all KDEs equally), and (ii) within the entire site (i.e. animals have access to all resources within the study site, including those outside of 99% KDEs). This mimics the problem of sufficiently sampling availability described above, but now availability is driven by conceptual or ecological definitions rather than by the sampling protocol itself. Similar consistency in  $\hat{\beta}$  was observed across  $M$  within a given definition of availability, but the sign and magnitude of  $\hat{\beta}$  varied with availability from individual- to site-level (Fig. 4). Despite the change in sign and magnitude, Equation (8) is able to calculate  $M_{pred}$  consistent with observation across availability definitions. By inclusion, given that  $N_{pred}$  is a component of  $M_{pred}$  (see Equation (5)), we also observe that Equation (3) is consistent with observation across availability definitions.

Lastly we asked, what are the primary drivers of  $N_{pred}$  and  $M_{pred}$  as estimated by Equations (3, 8)? A key outcome of our method is that this question can be answered analytically, by simply inspecting Equations (3, 8). Equation (3) shows that  $N_{pred}$  is inversely correlated to both  $\text{Var}[R(X_\beta)]$  and  $\beta^2$ , indicating that as either landscape variation or selection strength increase, so must  $N_{pred}$ . Similarly, because  $\beta^2$  is contained in the denominator of Equation (8),  $M_{pred}$  must decrease with increasing selection strength. To demonstrate this graphically, we plotted log-log regressions of  $N_{pred}$  and  $M_{pred}$  against  $\text{Var}[R(X_\beta)]$  and  $|\beta|$ , respectively, using data from all 10 species to evaluate whether these analytical predictions bear out under real data scenarios (Fig. 5). Per the analytical predictions, both  $N_{pred}$  and  $M_{pred}$  declined as their respective predictors (landscape variation or habitat selection strength) increased. It is also worth noting that inclusion of both predictors within the same log-log regression (i.e.  $M_{pred}$  as a function of both  $\text{Var}[R(X_\beta)]$  and  $|\beta|$ ) returned  $R^2 = 1$ , as expected given that  $N_{pred}$  and  $M_{pred}$  are determined only by  $\text{Var}[R(X_\beta)]$  and  $\beta$ .

## 276 Discussion

Conventional wisdom regarding sample size in RSA holds that a sample size of  $M \geq 30$  animals tagged is necessary for consistent and reliable inference (Leban *et al.* 2001; Hebblewhite & Haydon 2010). Convention also holds that more complex landscapes (i.e. those with higher landscape variance  $\text{Var}[R(X_\beta)]$ ) require more relocations per animal  $N$  to characterize selection (Wis 279 *et al.* 2008). Our analytical models and validation procedures return a contrasting set of results, contradicting conventional wisdom. First, we found that  $M_{pred}$  was often (but not always) substantially less than 30, and this prediction strongly agreed with observation based on resampling of GPS-based telemetry across a variety of ecologically contrasting species (Figs. 3, S1-S20). Strik- 285 ingly, our analytical results show conclusively that  $M$  can only decline with increasing absolute magnitude of  $\beta$  (Equation (8)), indicating the most biologically relevant effects (i.e. those with the greatest  $|\beta|$ ) can often be estimated with only a few animals (Fig. 5). This reveals important ethical and budgetary implications for wildlife studies. For example, consider the mule deer dataset 288 containing 106 tagged individuals (Table S1). Our findings show that the strongest effects on the utilization distribution (i.e. selection for temperature, evergreen forest, and shrublands) may be estimated with fewer than 20 animals (Fig. S20), i.e. 80% fewer animals than were used. This 291 means that, using a conservative estimate of US\$2,450 for each GPS collar and data fees (K. L. Monteith, pers. obs.), if the sole aim of the study were to identify the relevant resource drivers of animal distributions as in typical RSF studies, this project would have overspent by \$210,700 294 (excluding researcher/technician effort, which has significant cost in itself). Compared to the popular approach of tagging as many animals as possible and constructing phenomenological models to identify ecological mechanisms post hoc (colloquially referred to as “collar-and-foller”; 297 Dunn 2004; Fieberg & Johnson 2015), our analytical results suggest researchers start with efforts aimed at constructing a priori hypotheses and associated models, then use our Equations (3, 8) 300 to estimate the number of animals and locations per animal required for the study aims (Johnson *et al.* 2015).

Second,  $N_{pred}$  (the number of relocations per individual) also strongly agreed with observa-  
303 tion, with both predicted and observed  $N$  in the 1000s or larger (Fig. 3). This agrees with findings  
that within-replicate sample sizes should generally be large (e.g. Wisz *et al.* 2008); however, our  
analytical expressions also conclusively demonstrate that  $N$  is directly calculable (Equation (3))  
306 and as with  $M$  is expected to generally decline with increasing  $\text{Var}[R(X_\beta)]$  and  $\beta$ . These conclu-  
sions for both  $M$  and  $N$  are not only analytically proven but are additionally supported by real  
data bearing out the analytical predictions (Figs. 3–5). As such, our findings demonstrate that  
309 not only are  $M$  and  $N$  imminently calculable given a known landscape and some expectation of  
 $\beta$ , but the expected trends in  $M$  and  $N$  with respect to landscape complexity and the strength of  
animal preference are precisely opposite those predicted by conventional wisdom and previous  
312 studies.

Why are our results contrary to so much of the preceding literature? One possibility could  
lie in the “golden rule” of sample size, i.e. that  $M \geq 30$  is required for a sample size sufficient to  
315 invoke the Central Limit Theorem and assume a roughly normal distribution of possible sample  
means (Aho 2014, p. 154), or to ignore non-normality because a model structure is somehow “ro-  
bust” to non-normality (e.g. Hector 2015, p. 48). This is reinforced by an absence of mathematical  
318 attention to the sample size question. Previous studies have used simulation or empirical analy-  
ses to explore sample size sufficiency within particular species or systems (e.g. Leban *et al.* 2001;  
Loe *et al.* 2012; Sequeira *et al.* 2019), leading to conclusions that are quite specific to a given study  
321 but then are widely adopted as inferring pattern across all systems. By defining the problem  
mathematically (i.e. at what values of  $M$  and  $N$  do we reject the null hypothesis  $100(1 - \alpha)\%$   
of the time at significance  $p$ ?), we instead arrive at general analytical solutions that then may  
324 be tested with simulations and empirical analyses that are specifically designed for those solu-  
tions, rather than relying on intuitive but incorrect assumptions about the relationships between  
landscape variation relative to selection strength and RSA sample size sufficiency.

327 Our calculations show that the required  $M$  and  $N$  for a given study are dependent entirely  
on  $|\beta|$  and  $\text{Var}[R(X_\beta)]$ . The latter can be directly calculated given a landscape and an expectation



for  $\beta$ , but selecting an appropriate expected  $\beta$  is a critical step in estimating  $M$  and  $N$ . For  
330 *a priori* planning this could be accomplished using expert knowledge and previous literature;  
however, there may be no conceivable prior expectation of  $\beta$  in some RSA exercises. In such a  
case, one may elect to perform for example a sensitivity analysis given a range of  $\beta$  to select  
333 conservative estimates of  $M$  and  $N$ . Further, observe that  $\beta$  is often affected by a variety of  
ecological phenomena, including resource availability, competitor density, and seasonal effects  
(Mysterud & Ims 1998; McLoughlin *et al.* 2010; van Beest *et al.* 2016; Paolini *et al.* 2018). This  
336 implies that Equations (3 & 8) estimating  $N$  and  $M$  respectively are in fact hierarchical with  
dependencies not only on landscape variance (i.e.  $\text{Var}[R(X_\beta)]$ ) but also landscape composition  
and structure as they determine  $\beta$ . In scenarios where we are uncertain about possible values of  
339  $\beta$ , we may construct informed models suggesting likely values of  $\beta$  given an expectation for how  
the animal should behave as resource availability changes (e.g. generalized functional response  
models; Matthiopoulos *et al.* 2011). Such a hierarchical approach "borrows" information from  
342 the functional response model to provide a more ecologically informed range of possible  $\beta$  for a  
sensitivity analysis (Hobbs & Hooten 2015).

Our results also provide new insight into the importance of sufficient spatial sampling of  
345 availability. There was 1 outlier in the 1-to-1 comparison of  $N_{pred}$  and  $N_{obs}$ , and 1 in that of  $M_{pred}$   
and  $M_{obs}$  (Fig. 3). These occurred because the 99% range of the animals under observation was so  
large, and the underlying landscape rasters so finely grained, that our 1:1 use/availability sam-  
348 ple did not accurately portray the spatial integral of availability  $\int_{\Omega} A(\mathbf{x}')W(\mathbf{x}')d\mathbf{x}'$  (Equation (1)).  
This caused  $M_{pred}$  and  $N_{pred}$  to be based on a different, incomplete availability set compared to  
the fitted RSFs. This highlights an unexpected but critical conclusion: the sampling intensity  
351 for availability in RSF-styled models should be only as large as necessary to correctly character-  
ize the availability integral. Previous RSF-styled studies (including SSF) have almost exclusively  
sampled availability as we did here using ratios (i.e. 1:1, 1:10, 1:100, etc.; e.g. Boyce & McDonald  
354 1999; Fortin *et al.* 2005; Street *et al.* 2016). This encourages either sampling at an intensity insuf-  
ficient to approximate the spatial integral (as occurred here for outlying points in Fig. 3), or at

too great an intensity leading to overinflated sample sizes and biased standard errors, confidence  
357 intervals, and  $p$ -values. Both scenarios may affect inference, but despite these issues no general  
rule has been promoted for availability sampling in RSA. Based on our findings, we propose that  
this rule should be regular (non-random) sampling at a spatial interval equal to the resolution of  
360 the underlying landscape data such that every possible location within the availability boundary  
is considered. This would produce an availability observation for every raster pixel and thus  
overlap between used and available locations. Although it is suggested that such overlap is to  
363 be avoided (e.g. Wisz *et al.* 2008), logically a used location must also be available otherwise it  
cannot be selected, and removing used locations from availability can potentially omit important  
effects from the availability sample. Our equations indicate that this overlap is required by the  
366 mathematics of resource selection.

This finding reinforces that defining resource availability at the scale of the estimated model is  
a critical first step in planning a RSA. Our multi-scale analysis of mule deer produced remarkably  
369 different estimates for  $M$  at each of the three definitions of availability (site-wide, population-  
wide, and individual availability; Fig. 4), indicating that failure to properly define the available  
space can lead to incorrect estimates of both  $M$  and  $N$ . This is not a new finding; the importance  
372 of properly defining what is available for an animal to select is a long-standing issue in RSA re-  
search (e.g. Johnson 1980; Boyce & McDonald 1999; Fortin *et al.* 2005). However, the difficulty of  
calculating  $M$  and  $N$  for planning a RSA study increases with the biological scale of the intended  
375 model. Site-wide availability assumes all animals have access to resources on the entire land-  
scape and is similar in concept to first-order selection (i.e. where the species is located; Johnson  
1980), but availability may be sampled as a regular grid across the entire site. Population-wide  
378 availability refines the scale toward second-order selection (i.e. where animals situate their home  
ranges), but accurately defining a perimeter for the likely population range *a priori* within which  
to sample availability is non-trivial. This becomes even more difficult under individual availabil-  
381 ity; how can we anticipate the size and placement of individual home ranges? A feasible solution  
may be to delineate population boundaries and within this delineation generate random ranges

with area determined by the literature and expert knowledge. This would enable calculation  
384 of an average theoretical availability for any animal in the study site with appropriate standard  
error. This could then be used to produce an average prediction for  $M$  and  $N$ , and associated  
confidence limits, across the average home range composition.

387 We approached this analysis with the specific intention of evaluating how many GPS-tagged  
animals  $M$  are needed for RSF estimation, but there are many RSF applications that do not seek  
 $M$  or require GPS-tagging (e.g. plant distributions). For example, RSAs estimated for rare species  
390 will typically lack sufficient data for individual-based estimation of the utilization distribution  
 $u(x)$  such that  $M$  is irrelevant and only  $N$  need be evaluated. RSAs can be sensitive to small  
sample sizes (Wisz *et al.* 2008), yet they often generate accurate predictions for rare species with  
393 small datasets (McCune 2016), suggesting that for some rare species smaller  $N$  is sufficient to  
achieve a robust model. Our findings permit evaluation of this. Consider a hypothetical sce-  
nario where RSA is conducted for a rare species with 100 observations and  $\beta$  is recorded. Here,  
396 Equations (3–4) could be used to calculate  $N_{pred}$  as a *post hoc* metric of confidence assuming  $\beta$   
is the true population/species-level average selection coefficient. If  $N_{pred} \leq 100$ , then one could  
trust the outcome of the RSA; conversely,  $N_{pred} > 100$  would indicate additional data collection is  
399 necessary. Where that is not possible, one could systematically adjust  $z_\alpha$  and  $z_{p/2}$  (Equation (3))  
to determine the percent confidence interval that rejects the null hypothesis  $H_0 : \beta = 0$  and es-  
tablish a degree of confidence for model outcomes. Although there are issues with this approach  
402 (e.g. individual variation is ignored), this is a limitation of small datasets and not the equations  
identified here. Similarly, although we performed validation using GPS-based datasets, Equation  
(3) is agnostic to how data are collected and may also be applied to sessile organisms. Provided  
405 we can plausibly accept that  $\beta$  is roughly true and individual variation is either minimal or ac-  
commodated by the population-level  $\beta$  (presumably what has been estimated), our equations  
may be easily extended to evaluate most any RSA-based study.

408 We must emphasize that although  $M$  may only decline with increasing  $\beta$ , Equation (3) allows  
for a turning point to occur such that  $N$  initially decreases with  $|\beta|$  but eventually increases at

very large  $|\beta|$  (see Supplemental Information, Equation (25)). When selection strength is particu-  
411 larly strong, smaller sample sizes make it much more likely to obtain perfect separation between  
used and unused resources. In such a case one must collect more data to observe the animal not  
using a resource unit it should strongly prefer (or in the case of negative selection, to observe it  
414 using a resource it should strongly avoid). Practically, this means that sampling intensity for RSA  
is a greater concern for specialist organisms than generalists because specialists should exhibit  
typically larger  $|\beta|$  for preferred/avoided resource units than generalists. Although the equations  
417 identified here allow us to directly calculate  $N$  for any landscape and expected selection strength,  
we should generally expect that specialists will require larger  $N$  for precise RSA estimation.

The equations identified here explicitly evaluate the compatibility of a dataset with a given  
420 hypothetical model (i.e.  $\beta$ ). Calculating their solutions across gradients of  $N$  and  $M$  reveals  
how the number of data points (relocations) and number of replicates (animals) affect deter-  
mination of compatibility. Rather than the values of  $N$  and  $M$  required to achieve statistical  
423 significance, we instead suggest these be used to determine the relevant sample sizes necessary  
to achieve "consistent" results, i.e. if we increase sampling intensity would we see substantial  
change in estimated coefficients? From this perspective, we conclude that the number of ani-  
426 mals  $M$  required to consistently estimate the most biologically relevant effects in an RSA can be  
well below commonly touted sample size thresholds (i.e.  $M \geq 30$ ), particularly when selection  
strength is strong (Fig. 3, 5). Moreover, the number of required relocations  $N$  can also be quite  
429 small but tends toward larger sample sizes when landscape variation is small. The sufficiency  
of samples sizes  $M$  and  $N$  is dependent entirely on the strength of selection ( $|\beta|$ ) and landscape  
variation with respect to selection strength ( $\text{Var}[R(X_\beta)]$ ). Rather than simply reporting sample  
432 sizes in RSA studies, researchers should pay explicit attention to the effect their sample size has  
on their findings. Regardless of study organism, ecosystem, or scenario, our equations may be  
equally applied to *any* RSF-based study to evaluate the consistency of expected outcomes given  
435 a dataset of a particular size. This will partially address the so-called "replicability crisis" by  
explicitly characterizing the consistency of model outputs in relation to sample sizes and effect

sizes, thereby increasing reader (and reviewer) confidence in such studies. Similarly, editors and  
438 reviewers should abandon preconceived notions of what makes a sufficient sample size in RSA  
in favor of evaluating the sensitivity of findings to sample size based on the mathematical rules  
identified here, for it is also feasible (and indeed demonstrable) that consistent findings can be  
441 achieved with as few as  $N = 100$  relocations per animal and  $M = 2$  animals (Fig. 3). Because  
 $M$  and  $N$  can be easily calculated provided knowledge of ecological and landscape effects, we  
argue that such calculations should henceforth be a mandatory component for all RSA studies.

## 444 **Acknowledgments**

We thank the Movement Ecology Special Interest Group of The British Ecological Society for  
valuable discussion regarding this topic, in particular Marie Auger-Méthé. GMS thanks the  
447 Mississippi Agricultural and Forestry Experiment Station (MAFES); the Forest and Wildlife Re-  
search Center (FWRC); the United States Department of Agriculture National Institute of Food  
and Agriculture (USDA NIFA); and the Mississippi Department of Wildlife, Fisheries, and Parks  
450 (MDWFP) for supporting this research and associated data collection. JRP thanks the School of  
Mathematics and Statistics at the University of Sheffield for granting him study leave which has  
helped enable the research presented here. CMP, LJN, and EV respectfully acknowledge that  
453 Riding Mountain National Park is the traditional homeland of the Anishinabe People and the  
Métis Nation, within Treaty 2 territory and at the crossroads of Treaties 1 and 4. Contributions  
of SD and BKS were partially supported by the Mississippi State University Extension Service  
456 (MSUES), FWRC, and MDWFP. Contributions of JCB, OER, PES, GD, DAK, and DAB were par-  
tially supported by USDA Animal and Plant Health Inspection Service (APHIS), Wildlife Ser-  
vices (WS), National Wildlife Research Center (NWRC), and U.S. Department of Energy (DOE)  
459 through Cooperative Agreement number DE-FC09-07SR22506 with the University of Georgia  
Research Foundation. Contributions of ARR and JMF were supported by the Ontario Ministry  
of Natural Resources and Forestry (OMNRF). Contributions of KLM and SPD were supported

462 by Wyoming Game and Fish Department (WGFD), Bureau of Land Management (BLM), Muley  
Fanatic Foundation, Boone and Crockett Club, Wyoming Wildlife and Natural Resources Trust,  
Knobloch Family Foundation, Wyoming Animal Damage Management Board, Wyoming Gov-  
465 ernor's Big Game License Coalition, Bowhunters of Wyoming, Wyoming Outfitters and Guides  
Association, United States Forest Service (USFS), and United States Fish and Wildlife Service (US-  
FWS). Contributions of CMP, LJN, and EV were supported primarily by Parks Canada Agency  
468 (Riding Mountain National Park of Canada) and the Natural Science and Engineering Research  
Council of Canada (NSERC). Contributions of FMvB, LTB, and NMS were supported by the  
AUFF Starting Grant (AUFF-F-2016-FLS-8-16).

## 471 **Author Contributions**

GMS conceived and directed the project and developed the validation and resampling frame-  
work. JRP derived the analytic expressions, and GMS and JRP conducted the data analyses in  
474 collaboration with LB. GMS, JRP, and LB wrote the manuscript. Remaining authors collected and  
contributed data and contributed equally to edits and revisions.

## **Data Accessibility**

477 RSF and landscape data will be uploaded to a permanent repository following formal acceptance  
of this manuscript for publication.

## References

- 480 Aho, K.A. (2014). *Foundational and Applied Statistics for Biologists using R*. CRC Press, Boca Raton, FL.
- van Beest, F.M., McLoughlin, P.D., Mysterud, A. & Brook, R.K. (2016). Functional responses in  
483 habitat selection are density dependent in a large herbivore. *Ecography*, 39, 515–523.
- Boyce, M.S. & McDonald, L.L. (1999). Relating populations to habitats using resource selection functions. *Trends in Ecology & Evolution*, 14, 268–272.
- 486 Dunn, W.C. (2004). More suggestions for raising the bar for conservation - a response to anderson et al. *Wildlife Society Bulletin*, 32, 594–597.
- Elith, J. & Leathwick, J.R. (2009). Species distribution models: ecological explanation and predic-  
489 tion across space and time. *Annual Review of Ecology, Evolution, and Systematics*, 40, 677–697.
- Fieberg, J. & Johnson, D.H. (2015). MMI: multimodel inference or models with management implications? *Journal of Wildlife Management*, 79, 708–718.
- 492 Fortin, D., Beyer, H.L., Boyce, M.S., Smith, D.W., Duchesne, T. & Mao, J.S. (2005). Wolves influence elk movements: behaviour shapes a trophic cascade in Yellowstone National Park. *Ecology*, 86, 1320–1330.
- 495 Fretwell, S.D. & Lucas, H.L. (1969). On territorial behavior and other factors influencing habitat distribution in birds. I. Theoretical development. *Acta Biotheoretica*, 19, 16–36.
- Guillera-Arroita, G. & Lahoz-Monfort, J.J. (2012). Designing studies to detect differences in  
498 species occupancy: power analysis under imperfect detection. *Methods in Ecology & Evolution*, 3, 860–869.
- Hebblewhite, M. & Haydon, D.T. (2010). Distinguishing technology from biology: a critical  
501 review of the use of GPS telemetry data in ecology. *Philosophical Transactions of the Royal Society of London B: Biological Sciences*, 365, 2303–2312.

- Hector, A. (2015). *The New Statistics with R: An Introduction for Biologists*. Oxford University Press,  
504 Oxford, UK.
- Hobbs, N.T. & Hooten, M.B. (2015). *Bayesian Models: A Statistical Primer for Ecologists*. Princeton  
University Press, Princeton, NJ.
- 507 James, G., Witten, D., Hastie, T. & Tibshirani, R. (2013). *An Introduction to Statistical Learning with  
Applications in R*. Springer, New York, NY.
- Johnson, D.H. (1980). The comparison of usage and availability measurements for evaluating  
510 resource preference. *Ecology*, 61, 65–71.
- Johnson, P.C.D., Barry, S.J.E., Ferguson, H.M. & Müller, P. (2015). Power analysis for generalized  
linear mixed models in ecology and evolution. *Methods in Ecology & Evolution*, 6, 133–142.
- 513 Leban, F.A., Wisdom, M.J., Garton, E.O., Johnson, B.K. & Kie, J.G. (2001). Effect of sample size on  
the performance of resource selection analyses. In: *Radio Tracking and Wildlife Populations* (eds.  
Millspaugh, J.J. & Marzluff, J.M.). Academic Press, New York, NY, chap. 11, pp. 291–307.
- 516 Loe, L.E., Bonenfant, C., Meisingset, E.L. & Mysterud, A. (2012). Effects of spatial scale and  
sample size in GPS-based species distribution models: are the best models trivial for red deer  
management? *European Journal of Wildlife Research*, 58, 195–203.
- 519 Manly, B.F.J., McDonald, L.L., Thomas, D.L., McDonald, T.L. & Erickson, W.P. (2002). *Resource  
Selection by Animals: Statistical Design and Analysis for Field Studies*. 2nd edn. Kluwer Academic  
Publishers, Dordrecht, The Netherlands.
- 522 Matthiopoulos, J., Hebblewhite, M., Aarts, G. & Fieberg, J. (2011). Generalized functional re-  
sponses for species distributions. *Ecology*, 92, 583–589.
- McCune, J.L. (2016). Species distribution models predict rare species occurrences despite signifi-  
525 cant effects of landscape context. *Journal of Applied Ecology*, 53, 1871–1879.



- McLoughlin, P.D., Morris, D.W., Fortin, D., Vander Wal, E. & Contasti, A.L. (2010). Considering ecological dynamics in resource selection functions. *Journal of Animal Ecology*, 79, 4–12.
- 528 Mysterud, A. & Ims, R.A. (1998). Functional responses in habitat use: availability influences relative use in trade-off situations. *Ecology*, 79, 1435–1441.
- Paolini, K.E., Strickland, B.K., Tegt, J.L., VerCauteren, K.C. & Street, G.M. (2018). Seasonal varia-  
531 tion in preference dictates space use in an invasive generalist. *PLoS One*, 13, e0199078.
- Potts, J.R., Auger-Méthé, M., Mokross, K. & Lewis, M.A. (2014). A generalized residual technique for analysing complex movement models using earth mover's distance. *Methods in Ecology and*  
534 *Evolution*, 5, 1012–1022.
- Renner, I.W. & Warton, D.I. (2013). Equivalence of MAXENT and Poisson point process models for species distribution modeling in ecology. *Biometrics*, 69, 274–281.
- 537 Schlather, M., Malinowski, A., Oesting, M., Boecker, D., Strokorb, K., Engelke, S. *et al.* (2016). Randomfields: Simulation and analysis of random fields, r package. *Webpage* [http://CRAN.R-project.org/package= RandomFields](http://CRAN.R-project.org/package=RandomFields).
- 540 Sequeira, A.M.M., Heupel, M.R., Lea, M.A., Eguíluz, V.M., Guarte, C.M., Meekan, M.G. *et al.* (2019). The importance of sample size in marine megafauna tagging studies. *Ecological Applications*, In Press, e01947.
- 543 Street, G.M., Fieberg, J., Rodgers, A.R., Carstensen, M., Moen, R., Moore, S.A., Windels, S.K. & Forester, J.D. (2016). Habitat functional response mitigates reduced foraging opportunity: implications for animal fitness and space use. *Landscape Ecology*, 31, 1939–1953.
- 546 Strickland, M.D. & McDonald, L.L. (2006). Introduction to the special section on resource selection. *Journal of Wildlife Management*, 70, 321–323.
- Wisz, M.S., Hijmans, R.J., Li, J., Peterson, A.T., Graham, C.H., Guisan, A. & NCEAS Predicting

549 Species Distributions Working Group (2008). Effects of sample size on the performance of species distribution models. *Diversity & Distributions*, 14, 763–773.

## Figures

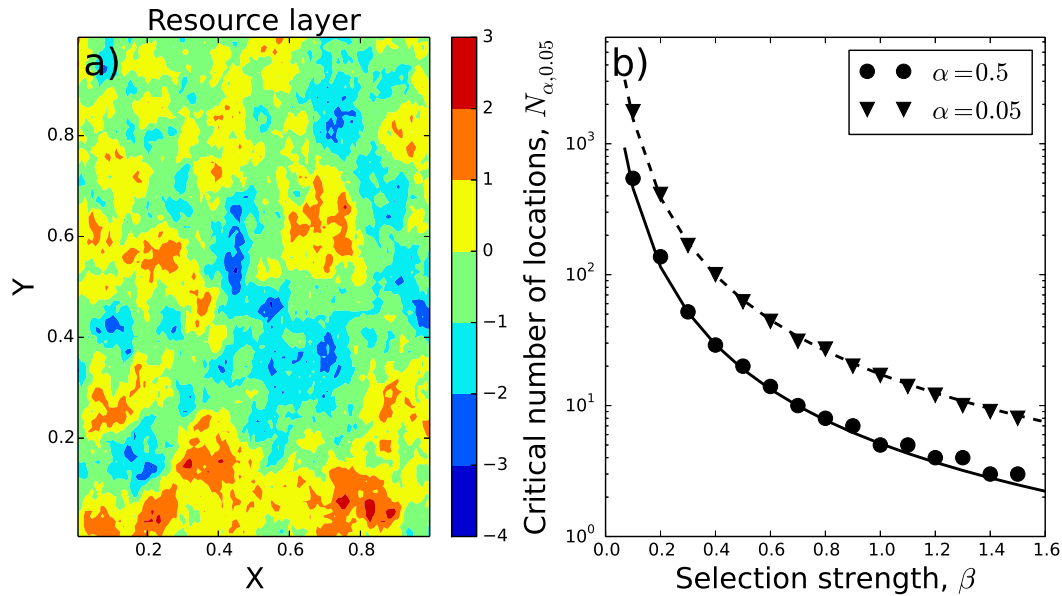

Figure 1: **Performance of analytic expression on simulated data.** Panel (a) shows a simulated resource layer,  $R(x)$ , which was used to construct the utilisation distribution (Equation 2) from which the simulated animal locations were samples. The circles (resp. triangles) in Panel (b) show the empirically-derived values of  $N_{0.5,0.05}(\beta)$  (resp.  $N_{0.05,0.05}(\beta)$ ), the minimum number of samples required so that there is a 50% chance (resp. 95% chance) of rejecting the null hypothesis that  $\beta = 0$  at a significance level of  $p = 0.05$ . The solid line (resp. dashed line) in Panel (b) shows the corresponding analytic approximations given by Equation (3) and the remarkable agreement with the empirically-derived values.

552

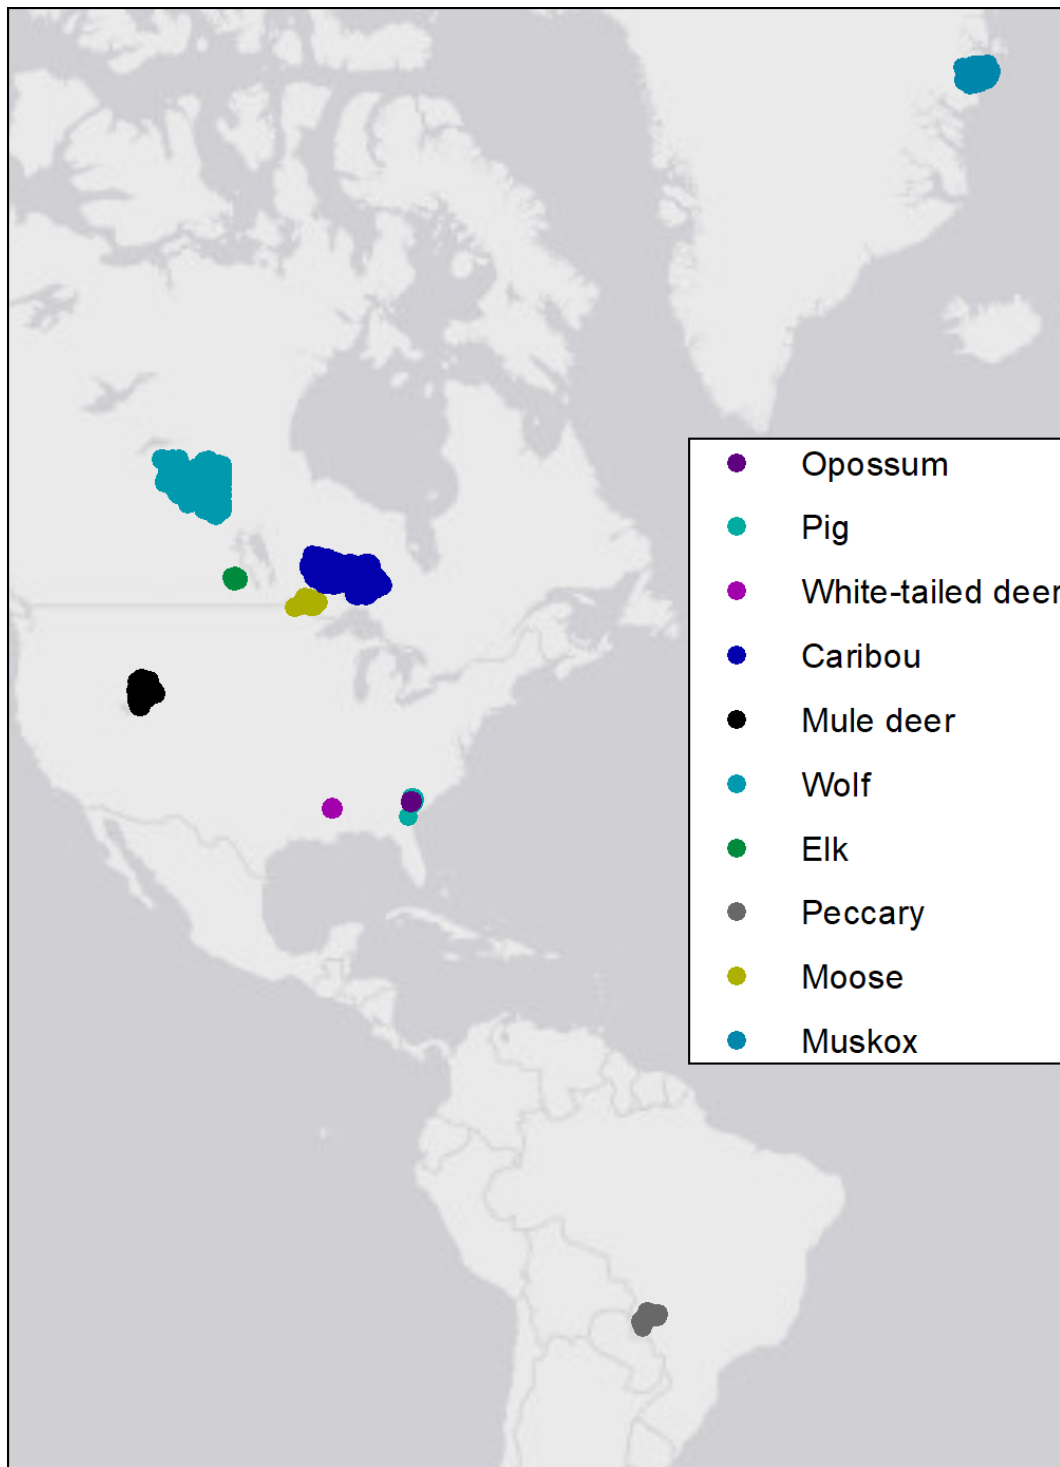

Figure 2: **Data distribution.** Geographic locations of GPS datasets (5,678,623 GPS relocations) across 511 individually collared members of 10 species.

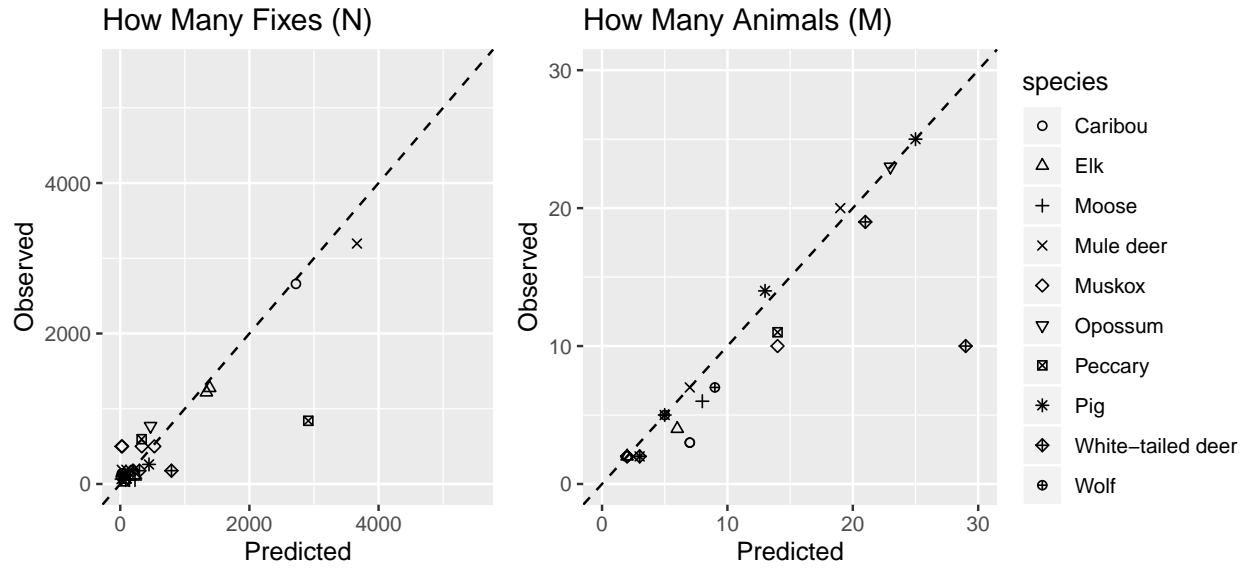

Figure 3: **1-to-1 comparison of predicted and observed M and N.** Three outliers are observed for *N* and one for *M* due to mismatch between sampled and true availability within the animals' 99% ranges. Dashed lines are those with gradient 1 crossing through the origin.

## Mule Deer: Temperature and Scale

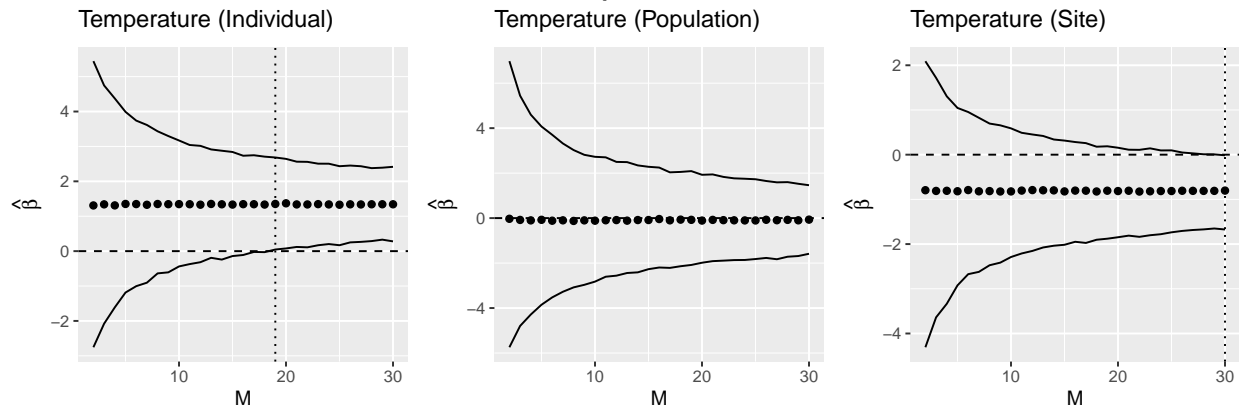

Figure 4: **Comparison of predicted  $M$  across orders of availability.**  $M_{pred}$  (vertical dotted line) changes depending on whether availability for the RSF is defined at the scale of the individual (each animal has its own available locations within its own 99% KDE), population (all animals have equal access to resources within all animal's 99% KDEs), or site (all animals have equal access to resources across the entire site). If no vertical dotted line occurs, then  $M_{pred} > 30$ .

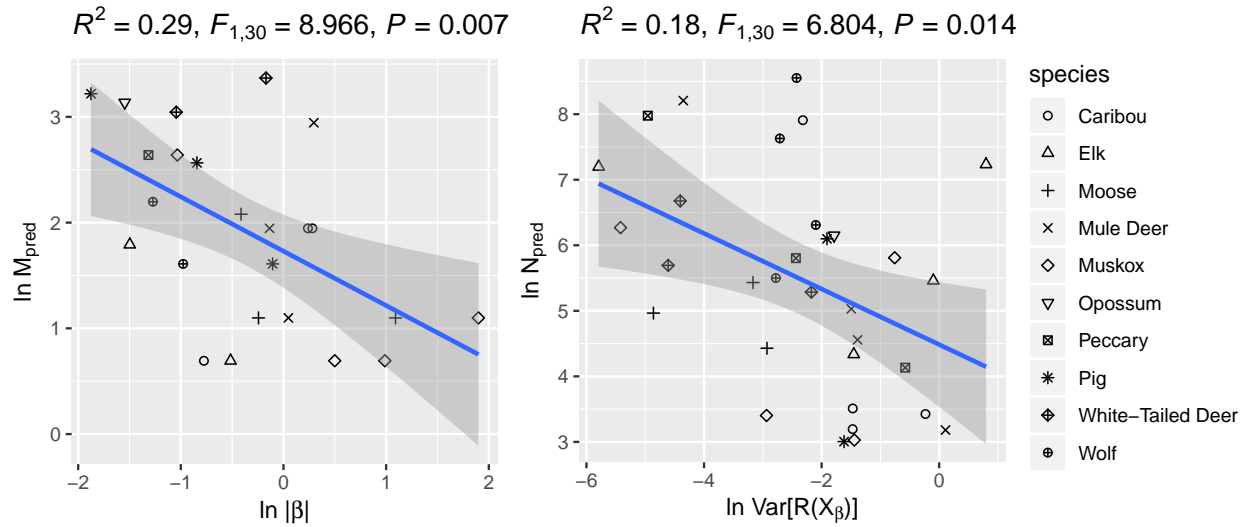

Figure 5: **Log-log regressions of predicted  $M$  vs.  $|\beta|$  and predicted  $N$  vs.  $\text{Var}[R(X_\beta)]$ .** The predicted number of animals necessary  $M_{pred}$  declines with increasing absolute magnitude of selection (i.e. stronger effects require fewer animals to estimate), and the predicted number of relocations  $N_{pred}$  declines with increasing landscape complexity.
